# Supplementary material for: Trends in maternal body mass index in Northern Ireland: a cross-sectional and longitudinal study
Source: HighWire-hosted journal article supplement (doi:10.1136/fmch-2021-001310), 2021-12-01
Supplement: fmch-2021-001310supp001_data_supplement.pdf [file fmch-2021-001310supp001_data_supplement.pdf]

## Online Supplement

| <b>Table S1: Percentage of singleton pregnancies in each BMI category according to deprivation quintile</b> |                                               |          |                                                         |          |                                                          |          |                                                       |          |                                                        |          |                                           |          |
|-------------------------------------------------------------------------------------------------------------|-----------------------------------------------|----------|---------------------------------------------------------|----------|----------------------------------------------------------|----------|-------------------------------------------------------|----------|--------------------------------------------------------|----------|-------------------------------------------|----------|
|                                                                                                             | <b>Under-weight</b><br><18.5kg/m <sup>2</sup> |          | <b>Normal weight</b><br>18.5 to 24.99 kg/m <sup>2</sup> |          | <b>Overweight</b><br>25.00 to 29.99<br>kg/m <sup>2</sup> |          | <b>Obese I</b><br>30.00 to 34.99<br>kg/m <sup>2</sup> |          | <b>Obese II</b><br>35.00 to 39.99<br>kg/m <sup>2</sup> |          | <b>Obese III</b><br>≥40 kg/m <sup>2</sup> |          |
| <b>Total (n)</b>                                                                                            | 3147                                          |          | 74041                                                   |          | 45098                                                    |          | 19097                                                 |          | 7861                                                   |          | 3717                                      |          |
|                                                                                                             | <b>n</b>                                      | <b>%</b> | <b>n</b>                                                | <b>%</b> | <b>n</b>                                                 | <b>%</b> | <b>n</b>                                              | <b>%</b> | <b>n</b>                                               | <b>%</b> | <b>n</b>                                  | <b>%</b> |
| <b>Northern Ireland Multiple Deprivation Measure</b>                                                        |                                               |          |                                                         |          |                                                          |          |                                                       |          |                                                        |          |                                           |          |
| (Most deprived) Q1                                                                                          | 880                                           | 2.6      | 15570                                                   | 45.5     | 9988                                                     | 29.2     | 4723                                                  | 13.8     | 2057                                                   | 6.0      | 1035                                      | 3.0      |
| Q2                                                                                                          | 665                                           | 2.0      | 15245                                                   | 46.4     | 9800                                                     | 29.8     | 4381                                                  | 13.3     | 1897                                                   | 5.8      | 869                                       | 2.6      |
| Q3                                                                                                          | 563                                           | 1.8      | 15031                                                   | 48.0     | 9421                                                     | 30.1     | 3943                                                  | 12.6     | 1616                                                   | 5.2      | 769                                       | 2.5      |
| Q4                                                                                                          | 568                                           | 1.9      | 14865                                                   | 50.1     | 8743                                                     | 29.5     | 3495                                                  | 11.8     | 1343                                                   | 4.5      | 640                                       | 2.2      |
| (Least deprived) Q5                                                                                         | 456                                           | 1.9      | 12659                                                   | 53.5     | 6818                                                     | 28.8     | 2442                                                  | 10.3     | 907                                                    | 3.8      | 388                                       | 1.6      |
| <b>Income</b>                                                                                               |                                               |          |                                                         |          |                                                          |          |                                                       |          |                                                        |          |                                           |          |
| (Most deprived) Q1                                                                                          | 815                                           | 2.3      | 16444                                                   | 46.4     | 10432                                                    | 29.4     | 4729                                                  | 13.3     | 2063                                                   | 5.8      | 994                                       | 2.8      |
| Q2                                                                                                          | 669                                           | 2.0      | 15926                                                   | 47.2     | 9986                                                     | 29.6     | 4427                                                  | 13.1     | 1808                                                   | 5.4      | 908                                       | 2.7      |
| Q3                                                                                                          | 619                                           | 2.1      | 14319                                                   | 47.5     | 9117                                                     | 30.2     | 3802                                                  | 12.6     | 1612                                                   | 5.3      | 697                                       | 2.3      |
| Q4                                                                                                          | 551                                           | 1.9      | 14019                                                   | 48.9     | 8464                                                     | 29.5     | 3495                                                  | 12.2     | 1419                                                   | 5.0      | 706                                       | 2.5      |
| (Least deprived) Q5                                                                                         | 478                                           | 2.0      | 12662                                                   | 53.3     | 6771                                                     | 28.5     | 2531                                                  | 10.7     | 918                                                    | 3.9      | 396                                       | 1.7      |
| <b>Employment</b>                                                                                           |                                               |          |                                                         |          |                                                          |          |                                                       |          |                                                        |          |                                           |          |
| (Most deprived) Q1                                                                                          | 845                                           | 2.7      | 14301                                                   | 44.9     | 9330                                                     | 29.3     | 4428                                                  | 13.9     | 1973                                                   | 6.2      | 965                                       | 3.0      |
| Q2                                                                                                          | 686                                           | 2.1      | 14976                                                   | 46.7     | 9497                                                     | 29.6     | 4260                                                  | 13.3     | 1791                                                   | 5.6      | 858                                       | 2.7      |
| Q3                                                                                                          | 574                                           | 1.8      | 15413                                                   | 48.2     | 9377                                                     | 29.3     | 4083                                                  | 12.8     | 1683                                                   | 5.3      | 826                                       | 2.6      |
| Q4                                                                                                          | 542                                           | 1.7      | 15470                                                   | 49.5     | 9405                                                     | 30.1     | 3693                                                  | 11.8     | 1432                                                   | 4.6      | 682                                       | 2.2      |
| (Least deprived) Q5                                                                                         | 485                                           | 2.0      | 13210                                                   | 53.5     | 7161                                                     | 29.0     | 2520                                                  | 10.2     | 941                                                    | 3.8      | 370                                       | 1.5      |
| <b>Health &amp; Disability</b>                                                                              |                                               |          |                                                         |          |                                                          |          |                                                       |          |                                                        |          |                                           |          |
| (Most deprived) Q1                                                                                          | 825                                           | 2.6      | 14538                                                   | 45.1     | 9418                                                     | 29.2     | 4511                                                  | 14.0     | 1957                                                   | 6.1      | 981                                       | 3.0      |

## Online Supplement

|                                         |     |     |       |      |       |      |      |      |      |     |      |     |
|-----------------------------------------|-----|-----|-------|------|-------|------|------|------|------|-----|------|-----|
| Q2                                      | 707 | 2.2 | 14952 | 46.3 | 9518  | 29.5 | 4296 | 13.3 | 1893 | 5.9 | 896  | 2.8 |
| Q3                                      | 579 | 1.8 | 15600 | 48.4 | 9537  | 29.6 | 4085 | 12.7 | 1624 | 5.0 | 788  | 2.4 |
| Q4                                      | 546 | 1.8 | 15536 | 50.0 | 9203  | 29.6 | 3658 | 11.8 | 1461 | 4.7 | 662  | 2.1 |
| (Least deprived) Q5                     | 475 | 2.0 | 12744 | 53.1 | 7094  | 29.6 | 2434 | 10.1 | 885  | 3.7 | 374  | 1.6 |
| <b>Education, Training &amp; Skills</b> |     |     |       |      |       |      |      |      |      |     |      |     |
| (Most deprived) Q1                      | 897 | 2.8 | 14503 | 44.8 | 9336  | 28.8 | 4595 | 14.2 | 2067 | 6.4 | 1005 | 3.1 |
| Q2                                      | 640 | 2.0 | 14649 | 46.2 | 9510  | 30.0 | 4247 | 13.4 | 1793 | 5.7 | 888  | 2.8 |
| Q3                                      | 590 | 1.8 | 16080 | 49.0 | 9592  | 29.2 | 4061 | 12.4 | 1660 | 5.1 | 834  | 2.5 |
| Q4                                      | 561 | 1.8 | 15743 | 49.6 | 9566  | 30.1 | 3812 | 12.0 | 1454 | 4.6 | 620  | 2.0 |
| (Least deprived) Q5                     | 444 | 1.9 | 12395 | 53.7 | 6766  | 29.3 | 2269 | 9.8  | 846  | 3.7 | 354  | 1.5 |
| <b>Access to Services</b>               |     |     |       |      |       |      |      |      |      |     |      |     |
| (Most deprived) Q1                      | 535 | 1.6 | 16782 | 48.8 | 10591 | 30.8 | 4113 | 12.0 | 1672 | 4.9 | 714  | 2.1 |
| Q2                                      | 649 | 1.9 | 16410 | 48.9 | 9931  | 29.6 | 4140 | 12.3 | 1641 | 4.9 | 810  | 2.4 |
| Q3                                      | 647 | 2.2 | 14075 | 48.4 | 8436  | 29.0 | 3635 | 12.5 | 1494 | 5.1 | 768  | 2.6 |
| Q4                                      | 602 | 2.2 | 12748 | 47.1 | 7954  | 29.4 | 3576 | 13.2 | 1485 | 5.5 | 686  | 2.5 |
| (Least deprived) Q5                     | 699 | 2.5 | 13355 | 48.2 | 7858  | 28.4 | 3520 | 12.7 | 1528 | 5.5 | 723  | 2.6 |
| <b>Living Environment</b>               |     |     |       |      |       |      |      |      |      |     |      |     |
| (Most deprived) Q1                      | 736 | 2.5 | 13963 | 48.2 | 8292  | 28.6 | 3716 | 12.8 | 1545 | 5.3 | 716  | 2.5 |
| Q2                                      | 574 | 2.1 | 13445 | 48.1 | 8415  | 30.1 | 3485 | 12.5 | 1373 | 4.9 | 657  | 2.4 |
| Q3                                      | 615 | 2.0 | 15016 | 48.1 | 9260  | 29.7 | 3824 | 12.3 | 1703 | 5.5 | 780  | 2.5 |
| Q4                                      | 569 | 1.8 | 15215 | 48.9 | 9214  | 29.6 | 3858 | 12.4 | 1531 | 4.9 | 724  | 2.3 |
| (Least deprived) Q5                     | 638 | 2.0 | 15731 | 48.3 | 9589  | 29.5 | 4101 | 12.6 | 1668 | 5.1 | 824  | 2.5 |
| <b>Crime &amp; Disorder</b>             |     |     |       |      |       |      |      |      |      |     |      |     |
| (Most deprived) Q1                      | 839 | 2.7 | 14401 | 46.1 | 9070  | 29.1 | 4169 | 13.4 | 1824 | 5.8 | 911  | 2.9 |
| Q2                                      | 660 | 2.2 | 13796 | 46.9 | 8561  | 29.1 | 3940 | 13.4 | 1654 | 5.6 | 809  | 2.7 |
| Q3                                      | 597 | 1.9 | 15285 | 49.0 | 9047  | 29.0 | 3870 | 12.4 | 1571 | 5.0 | 795  | 2.6 |
| Q4                                      | 559 | 1.8 | 15340 | 49.5 | 9308  | 30.0 | 3660 | 11.8 | 1477 | 4.8 | 654  | 2.1 |
| (Least deprived) Q5                     | 477 | 1.6 | 14548 | 50.2 | 8784  | 30.3 | 3345 | 11.5 | 1294 | 4.5 | 532  | 1.8 |

## Online Supplement

| <b>Rurality</b> |      |     |       |      |       |      |       |      |      |     |      |     |
|-----------------|------|-----|-------|------|-------|------|-------|------|------|-----|------|-----|
| Mixed           | 261  | 2.0 | 6426  | 50.1 | 3805  | 29.6 | 1471  | 11.5 | 583  | 4.5 | 288  | 2.2 |
| Rural           | 849  | 1.7 | 24710 | 48.6 | 15397 | 30.3 | 6176  | 12.1 | 2549 | 5.0 | 1169 | 2.3 |
| Urban           | 2022 | 2.3 | 42234 | 47.9 | 25568 | 29.0 | 11337 | 12.9 | 4688 | 5.3 | 2244 | 2.5 |
