# Supplementary material for: Trends in maternal body mass index in Northern Ireland: a cross-sectional and longitudinal study
Source: HighWire-hosted journal article supplement (doi:10.1136/fmch-2021-001310), 2021-12-01
Supplement: fmch-2021-001310supp003_data_supplement.pdf [file fmch-2021-001310supp003_data_supplement.pdf]

## Online Supplement

|      | Under-weight |     | Normal weight |      | Over-weight |      | Obese I |      | Obese II |     | Obese III |     |
|------|--------------|-----|---------------|------|-------------|------|---------|------|----------|-----|-----------|-----|
|      | n            | %   | n             | %    | n           | %    | n       | %    | n        | %   | n         | %   |
| 2010 | 225          | 2.3 | 5077          | 50.8 | 2855        | 28.6 | 1190    | 11.9 | 423      | 4.2 | 225       | 2.3 |
| 2011 | 459          | 2.0 | 11281         | 50.2 | 6530        | 29.1 | 2718    | 12.1 | 1030     | 4.6 | 460       | 2.0 |
| 2012 | 495          | 2.2 | 10955         | 49.4 | 6495        | 29.3 | 2667    | 12.0 | 1054     | 4.8 | 511       | 2.3 |
| 2013 | 459          | 2.1 | 10915         | 49.2 | 6547        | 29.5 | 2682    | 12.1 | 1084     | 4.9 | 497       | 2.2 |
| 2014 | 424          | 1.9 | 10791         | 48.7 | 6447        | 29.1 | 2771    | 12.5 | 1166     | 5.3 | 551       | 2.5 |
| 2015 | 477          | 2.2 | 10468         | 47.2 | 6703        | 30.2 | 2799    | 12.6 | 1181     | 5.3 | 554       | 2.5 |
| 2016 | 402          | 1.9 | 9929          | 45.9 | 6485        | 30.0 | 2925    | 13.5 | 1271     | 5.9 | 632       | 2.9 |
| 2017 | 206          | 2.0 | 4624          | 45.6 | 3036        | 29.9 | 1345    | 13.3 | 652      | 6.4 | 287       | 2.8 |
