# Supplementary material for: Trends in maternal body mass index in Northern Ireland: a cross-sectional and longitudinal study
Source: HighWire-hosted journal article supplement (doi:10.1136/fmch-2021-001310), 2021-12-01
Supplement: fmch-2021-001310supp004_data_supplement.pdf [file fmch-2021-001310supp004_data_supplement.pdf]

## Online Supplement

| <b>Table S3: Maternal demographic and clinical characteristics of multiple pregnancies</b> |                                                   |                                               |                                                            |                                                          |                                                       |                                                        |                                           |                                      |
|--------------------------------------------------------------------------------------------|---------------------------------------------------|-----------------------------------------------|------------------------------------------------------------|----------------------------------------------------------|-------------------------------------------------------|--------------------------------------------------------|-------------------------------------------|--------------------------------------|
| <b>Multiples pregnancies (N=2362; n=2323 twin, n=39 triplet)</b>                           |                                                   |                                               |                                                            |                                                          |                                                       |                                                        |                                           |                                      |
|                                                                                            | <b>Total</b>                                      | <b>Under-weight</b><br><18.5kg/m <sup>2</sup> | <b>Normal weight</b><br>18.5 to 24.99<br>kg/m <sup>2</sup> | <b>Overweight</b><br>25.00 to<br>29.99 kg/m <sup>2</sup> | <b>Obese I</b><br>30.00 to<br>34.99 kg/m <sup>2</sup> | <b>Obese II</b><br>35.00 to<br>39.99 kg/m <sup>2</sup> | <b>Obese III</b><br>≥40 kg/m <sup>2</sup> | <b>ANOVA</b><br><b>χ<sup>2</sup></b> |
| <b>Frequency (n)</b>                                                                       | 2362<br><i>n=2323 twin</i><br><i>n=39 triplet</i> | 41                                            | 1,131                                                      | 738                                                      | 297                                                   | 109                                                    | 46                                        |                                      |
| <b>Percentage of total pregnancies (%)</b>                                                 | -                                                 | 1.74                                          | 47.88                                                      | 31.24                                                    | 12.57                                                 | 4.61                                                   | 1.95                                      |                                      |
| <b>Age (mean±SD yr)</b>                                                                    | 31.44±5.3                                         | 29.46±4.2                                     | 31.63±5.2                                                  | 31.56±5.3                                                | 30.98±5.5                                             | 31.30±5.5                                              | 30.20±5.3                                 | p=.028                               |
| <b>Age Group n(%)</b>                                                                      |                                                   |                                               |                                                            |                                                          |                                                       |                                                        |                                           |                                      |
| 13-29y                                                                                     | 837<br>(35.4)                                     | 23<br>(56.1)                                  | 380<br>(33.6)                                              | 240<br>(32.5)                                            | 127<br>(42.8)                                         | 44<br>(40.4)                                           | 23<br>(50)                                | p<.001                               |
| 30+y                                                                                       | 1525<br>(64.6)                                    | 18<br>(43.9)                                  | 751<br>(66.4)                                              | 498<br>(67.5)                                            | 170<br>(57.2)                                         | 65<br>(59.6)                                           | 23<br>(50)                                |                                      |
| <b>Self-reported Employment (n(%))</b>                                                     |                                                   |                                               |                                                            |                                                          |                                                       |                                                        |                                           |                                      |
| Yes                                                                                        | 1808<br>(76.5)                                    | 28<br>(68.3)                                  | 912<br>(80.6)                                              | 554<br>(75.1)                                            | 209<br>(70.3)                                         | 73<br>(67.0)                                           | 32<br>(69.6)                              | p<.001                               |
| No                                                                                         | 502<br>(21.3)                                     | 13<br>(32.7)                                  | 190<br>(16.7)                                              | 172<br>(23.3)                                            | 79<br>(26.6)                                          | 34<br>(31.2)                                           | 14<br>(30.4)                              |                                      |
| Missing                                                                                    | 52<br>(2.2)                                       | †                                             | †                                                          | †                                                        | †                                                     | †                                                      | †                                         |                                      |
| <b>Ethnicity</b>                                                                           |                                                   |                                               |                                                            |                                                          |                                                       |                                                        |                                           |                                      |
| White                                                                                      | 1,664<br>(70.4)                                   | 27<br>(65.9)                                  | 794<br>(70.2)                                              | 509<br>(67.0)                                            | 225<br>(75.8)                                         | 76<br>(69.7)                                           | 33<br>(71.7)                              | p=.49                                |
| Other                                                                                      | 35<br>(1.5)                                       | †                                             | †                                                          | †                                                        | †                                                     | †                                                      | †                                         |                                      |
| Unknown                                                                                    | 663<br>(28.1)                                     | †                                             | †                                                          | †                                                        | †                                                     | †                                                      | †                                         |                                      |
| <b>Parity</b>                                                                              |                                                   |                                               |                                                            |                                                          |                                                       |                                                        |                                           |                                      |

## Online Supplement

|                                                 |                 |              |                 |               |               |               |              |         |
|-------------------------------------------------|-----------------|--------------|-----------------|---------------|---------------|---------------|--------------|---------|
| 0                                               | 964<br>(40.8)   | 15<br>(36.6) | 505<br>(44.7)   | 282<br>(38.2) | 115<br>(38.7) | 34<br>(31.2)  | 13<br>(28.3) | p=.017  |
| 1                                               | 782<br>(33.1)   | 13<br>(31.7) | 360<br>(31.8)   | 252<br>(34.1) | 102<br>(34.3) | 36<br>(33.0)  | 19<br>(41.3) |         |
| >2                                              | 604<br>(25.6)   | 13<br>(31.7) | 258<br>(22.8)   | 201<br>(27.2) | 79<br>(26.6)  | 39<br>(35.8)  | 14<br>(30.4) |         |
| Missing                                         | 12<br>(0.5)     | †            | †               | †             | †             | †             | †            |         |
| <b>Planned pregnancy</b>                        |                 |              |                 |               |               |               |              |         |
| Yes                                             | 1,906<br>(80.7) | 35<br>(85.4) | 929<br>(82.1)   | 600<br>(81.3) | 231<br>(77.7) | 80<br>(73.4)  | 31<br>(67.4) | p=.008  |
| No                                              | †               | †            | 192<br>(17.0)   | 133<br>(18.0) | 66<br>(20.0)  | 29<br>(26.6)  | 15<br>(32.6) |         |
| Missing                                         | 16<br>(0.7)     | †            | †               | †             | †             | †             | †            |         |
| <b>Folic Acid</b>                               |                 |              |                 |               |               |               |              |         |
| Yes                                             | 2,244<br>(95.0) | 39<br>(95.1) | 1,083<br>(95.8) | 703<br>(95.3) | 276<br>(92.9) | 100<br>(91.7) | 43<br>(93.5) | p=0.235 |
| Not recorded                                    | 118<br>(5.0)    | -            | -               | -             | -             | -             | -            |         |
| <b>Systolic blood pressure (mmHg), Mean±SD</b>  | 115.08±12.4     | 108.90±12.5  | 112.32±11.3     | 115.75±12.3   | 120.81±12.7   | 121.65±11.9   | 125.00±12.2  | p<.001  |
| <b>Diastolic blood pressure (mmHg), Mean±SD</b> | 69.16±9.24      | 64.79±8.0    | 67.40±8.8       | 69.64±9.0     | 72.40±9.6     | 73.97±8.8     | 76.07±10.1   | p<.001  |
| <b>History of Hypertension†</b>                 | 86<br>(3.64)    | †            | 16<br>(1.41)    | 32<br>(4.34)  | 24<br>(8.08)  | †             | †            | -       |
| <b>History of Type 1 Diabetes†</b>              | †               | †            | †               | †             | †             | †             | †            | -       |
| <b>History of Type 2 Diabetes†</b>              | †               | †            | †               | †             | †             | †             | †            | -       |

## Online Supplement

|                                        |   |   |              |              |              |   |   |        |
|----------------------------------------|---|---|--------------|--------------|--------------|---|---|--------|
| <b>History of TIA/ Stroke‡</b>         | † | † | †            | †            | †            | † | † | -      |
| <b>History of psychiatric illness‡</b> | † | † | 50<br>(4.42) | 46<br>(6.23) | 28<br>(9.43) | † | † | p=.020 |

Data presented as n(%) unless otherwise stated

Abbreviations: NIMATS = Northern Ireland Maternity System; TIA = transient ischaemic attack

†= suppressed due to small numbers (<10); ‡=Recorded at booking visit
