# Supplementary material for: Trends in maternal body mass index in Northern Ireland: a cross-sectional and longitudinal study
Source: HighWire-hosted journal article supplement (doi:10.1136/fmch-2021-001310), 2021-12-01
Supplement: fmch-2021-001310supp005_data_supplement.pdf [file fmch-2021-001310supp005_data_supplement.pdf]

## Online Supplement

| <b>Table S4: Change in distribution of BMI category in multiple pregnancies 2010 to 2017</b> |                                |      |                                                |      |                                             |      |
|----------------------------------------------------------------------------------------------|--------------------------------|------|------------------------------------------------|------|---------------------------------------------|------|
| Year                                                                                         | Underweight & Normal<br><25.00 |      | Overweight<br>25.00 to 29.99 kg/m <sup>2</sup> |      | Obese (I, II, III)<br>≥40 kg/m <sup>2</sup> |      |
|                                                                                              | n                              | %    | n                                              | %    | n                                           | %    |
| 2010                                                                                         | 70                             | 52.6 | 38                                             | 28.6 | 25                                          | 18.8 |
| 2011                                                                                         | 172                            | 49.6 | 114                                            | 32.9 | 61                                          | 17.6 |
| 2012                                                                                         | 181                            | 48.9 | 123                                            | 33.2 | 66                                          | 17.8 |
| 2013                                                                                         | 180                            | 52.8 | 97                                             | 28.4 | 64                                          | 18.8 |
| 2014                                                                                         | 150                            | 47.2 | 105                                            | 33.0 | 63                                          | 19.8 |
| 2015                                                                                         | 181                            | 51.6 | 116                                            | 33.0 | 54                                          | 15.4 |
| 2016                                                                                         | 149                            | 45.2 | 97                                             | 29.4 | 84                                          | 25.5 |
| 2017                                                                                         | 89                             | 51.7 | 48                                             | 27.9 | 35                                          | 20.3 |
